# Supplementary material for: Why ‘one size fits all’ is not enough when designing COVID-19 immunity certificates for domestic use: a UK-wide cross-sectional online survey
Source: HighWire-hosted journal article supplement (doi:10.1136/bmjopen-2021-058317), 2022-04-01
Supplement: bmjopen-2021-058317supp001_data_supplement.pdf [file bmjopen-2021-058317supp001_data_supplement.pdf]

## Supplementary Materials

Supplementary Table 1 Demographic characteristics of sample

|                      |                                  | Freq. | Percent | Cum.   |
|----------------------|----------------------------------|-------|---------|--------|
| <b>Gender</b>        | Female                           | 277   | 51.87%  | 51.87% |
|                      | Male                             | 254   | 47.57%  | 99.44% |
|                      | Self-define                      | 1     | 0.19%   | 100%   |
|                      | Prefer not to say                | 2     | 0.37%   | 99.81% |
| <b>Age</b>           | 18 – 23                          | 77    | 14.42%  | 14.42% |
|                      | 24 – 29                          | 51    | 9.55%   | 23.97% |
|                      | 30 – 39                          | 95    | 17.79%  | 41.76% |
|                      | 40 – 49                          | 87    | 16.29%  | 58.05% |
|                      | 50 – 59                          | 95    | 17.79%  | 75.84% |
|                      | 60 – 69                          | 109   | 20.41%  | 96.25% |
|                      | 70 or older                      | 20    | 3.75%   | 100%   |
| <b>Ethnicity</b>     | Asian                            | 34    | 6.37%   | 6.37%  |
|                      | Black                            | 20    | 3.75%   | 10.11% |
|                      | Hispanic/Latino                  | 3     | 0.56%   | 10.67% |
|                      | Mixed                            | 15    | 2.81%   | 13.48% |
|                      | Other                            | 8     | 1.50%   | 14.98% |
|                      | South Asian                      | 12    | 2.25%   | 17.23% |
| <b>Region</b>        | White                            | 442   | 82.77%  | 100%   |
|                      | East Midlands                    | 42    | 7.87%   | 7.87%  |
|                      | East of England                  | 35    | 6.55%   | 14.42% |
|                      | London                           | 81    | 15.17%  | 29.59% |
|                      | Northeast                        | 32    | 5.99%   | 35.58% |
|                      | Northern Ireland                 | 11    | 2.06%   | 37.64% |
|                      | Northwest England                | 58    | 10.86%  | 48.50% |
|                      | Scotland                         | 37    | 6.93%   | 55.43% |
|                      | South-East England               | 87    | 16.29%  | 71.72% |
|                      | Southwest of England             | 43    | 8.05%   | 79.78% |
|                      | Wales                            | 19    | 3.56%   | 83.33% |
| <b>Area</b>          | West Midlands                    | 45    | 8.43%   | 91.76% |
|                      | Yorkshire and the Humber         | 44    | 8.24%   | 100%   |
| <b>Accommodation</b> | Rural                            | 166   | 31.09%  | 31.09% |
|                      | Urban                            | 368   | 68.91%  | 100%   |
|                      | Living alone                     | 87    | 16.29%  | 16.29% |
|                      | Living in shared accommodation   | 54    | 10.11%  | 26.40% |
| <b>Employment</b>    | Living with other family members | 382   | 71.54%  | 97.94% |
|                      | Other                            | 11    | 2.06%   | 100%   |
|                      | Employed/Self-employed           | 340   | 63.67%  | 63.67% |
| <b>Education</b>     | Retired                          | 97    | 18.16%  | 81.84% |
|                      | Unemployed                       | 97    | 18.16%  | 100%   |
|                      | A level (or equivalent)          | 130   | 24.34%  | 24.34% |
|                      | GCSE (or equivalent)             | 80    | 14.98%  | 39.33% |
|                      | Postgraduate degree              | 95    | 17.79%  | 57.12% |
| <b>Disability</b>    | Undergraduate degree             | 175   | 32.77%  | 89.89% |
|                      | Vocational                       | 54    | 10.11%  | 100%   |
| <b>All</b>           | No                               | 467   | 87.45%  | 87.45% |
|                      | Prefer not to say                | 6     | 1.12%   | 88.58% |
|                      | Yes                              | 61    | 11.42%  | 100%   |
| <b>All</b>           |                                  | 534   | 100%    |        |
